# Supplementary material
Source: PubMed Central journal article supplement (PMC3292799)
Supplement: NIHMS359446-supplement-1_si_001.pdf [file NIHMS359446-supplement-1_si_001.pdf]

*Supplementary Figure 1:* Positive Mode CID MALDI FT-ICR MS/MS Spectrum of  $m/z$  1811.6  $[M+Na]^+$ . Tandem MS is used to confirm the composition of N-glycans and connectivity of the monosaccharides.

*Supplementary Figure 2:* Extracted Ion Chromatogram before and after reduction of glycan corresponding to 4Hex, 4HexNAc, 1Fuc. A: EIC of  $m/z$  813.2  $[M+2H]^{+2}$  shows four peaks with anomer contribution. B: EIC of  $m/z$  814.2  $[M+2H]^{+2}$  shows two peaks after sodium borohydride reduction.

*Supplementary Figure 3: Global Glycan Pool Zoom-Ins.* A: Zoom-in between RT 16.8 minutes and 22.8 minutes with high mannose glycans elution highlighted. B: Zoom-in between RT 21.0 minutes and 30.5 minutes to highlight the elution of larger highly-sialylated glycans.

*Supplementary Table 1:* Glycan Library containing list of most abundant compounds annotated with accurate mass, retention time, glycan structure, glycan type, glycan composition, and protein source.

Supplementary Figure 1

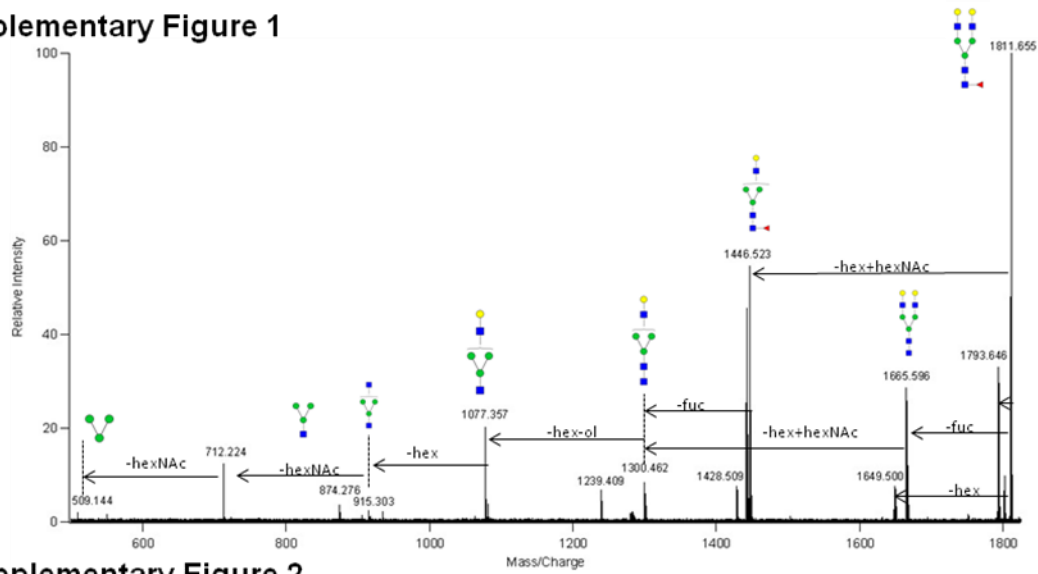

Supplementary Figure 2

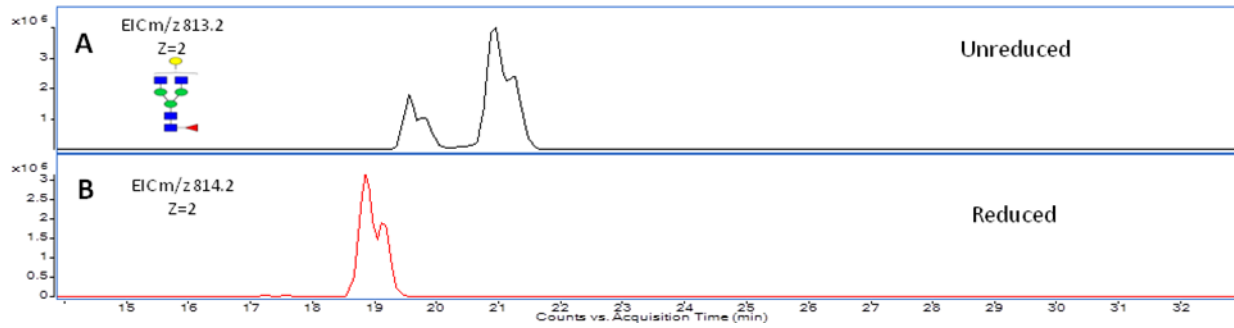

### Supplementary Figure3

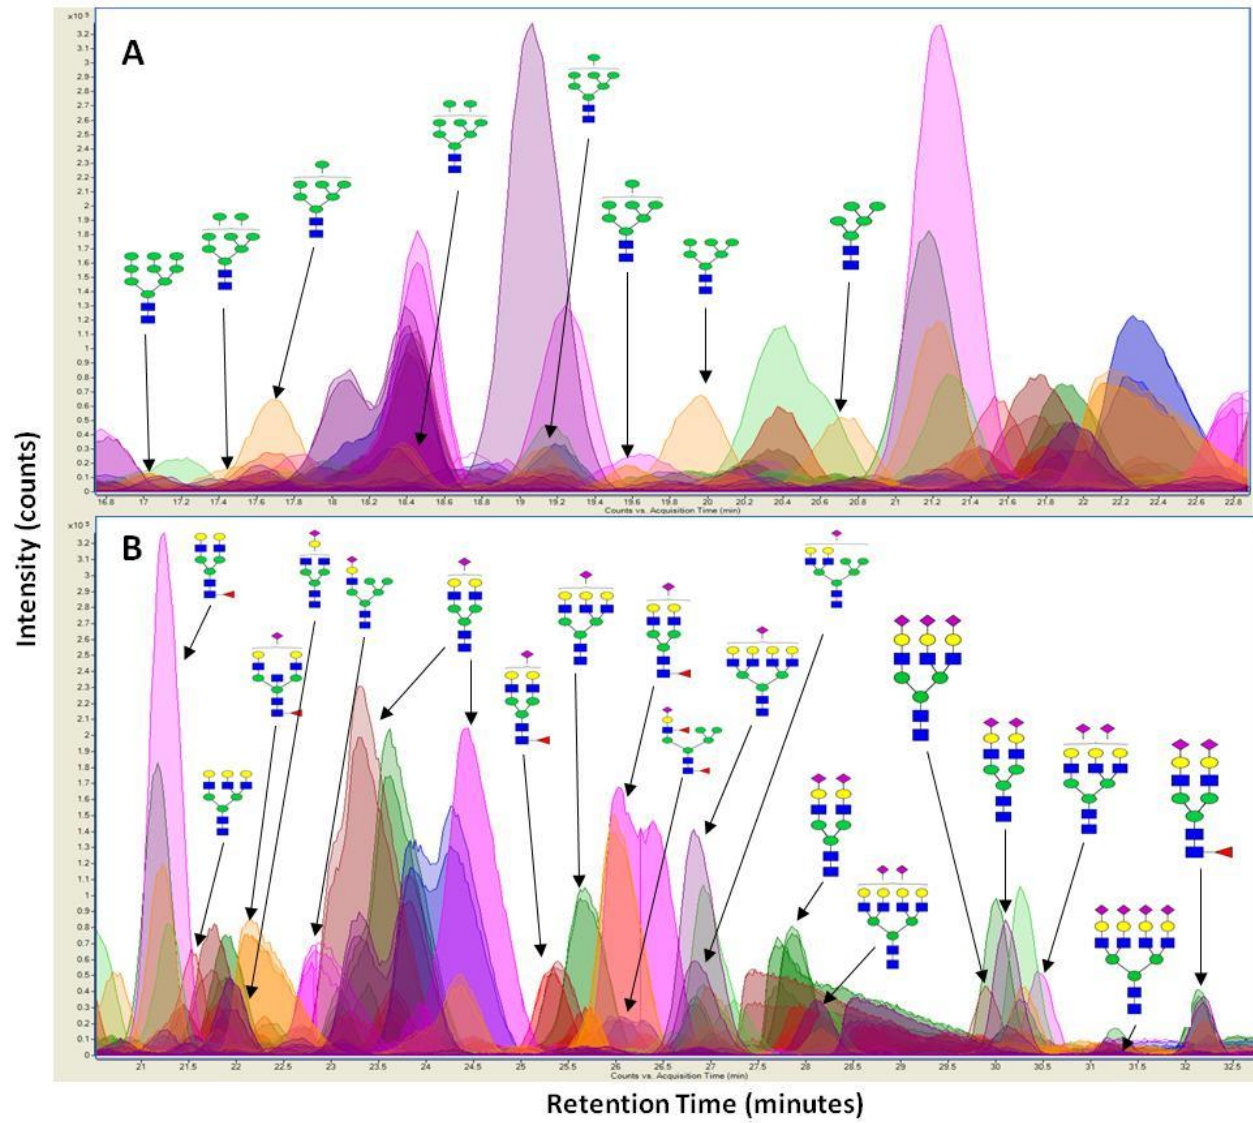

Supplementary Table 1

| Number | Mass   | RT   | Structure                                                                           | Glycan Type  | Composition                                  | Protein                                                      |
|--------|--------|------|-------------------------------------------------------------------------------------|--------------|----------------------------------------------|--------------------------------------------------------------|
| 1      | 912.3  | 18.1 | 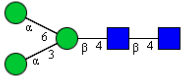   | Complex      | H <sub>3</sub> N <sub>2</sub>                | IgA, IgM, IgG, anti-trypsin, Transferrin, AGP, alpha-2-macro |
| 2      | 1058.4 | 22.1 |    | Complex      | H <sub>3</sub> N <sub>2</sub> F <sub>1</sub> | IgA                                                          |
| 3      | 1074.4 | 13.6 |    | High Mannose | H <sub>4</sub> N <sub>2</sub>                | IgM, IgA, alpha-2-macro                                      |
| 4      | 1074.4 | 18.0 |  | High Mannose | H <sub>4</sub> N <sub>2</sub>                | IgM, alpha-2-macro                                           |
| 5      | 1115.4 | 20.7 |  | Complex      | H <sub>3</sub> N <sub>3</sub>                | anti-trypsin, IgA, alpha-2-macro                             |

|    |        |      |  |              |                                              |                                |
|----|--------|------|--|--------------|----------------------------------------------|--------------------------------|
| 6  | 1115.4 | 23.6 |  | Complex      | H <sub>3</sub> N <sub>3</sub>                | anti-trypsin, IgA, Transferrin |
| 7  | 1115.4 | 18.9 |  | Complex      | H <sub>3</sub> N <sub>3</sub>                | IgG                            |
| 8  | 1236.5 | 20.6 |  | High Mannose | H <sub>5</sub> N <sub>2</sub>                | IgM, AGP, alpha-2-macro, IgA   |
| 9  | 1236.5 | 18.1 |  | High Mannose | H <sub>5</sub> N <sub>2</sub>                | IgM, alpha-2-macro             |
| 10 | 1261.5 | 22.1 |  | Complex      | H <sub>3</sub> N <sub>3</sub> F <sub>1</sub> | IgA, alpha-2-macro             |

|    |        |      |                                                                                     |         |             |                                  |
|----|--------|------|-------------------------------------------------------------------------------------|---------|-------------|----------------------------------|
| 11 | 1261.5 | 19.7 | 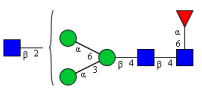   | Complex | $H_3N_3F_1$ | IgM, IgG, anti-trypsin           |
| 12 | 1277.5 | 22.1 |    | Complex | $H_4N_3$    | IgA                              |
| 13 | 1277.5 | 24.6 |    | Complex | $H_4N_3$    | alpha-2-macro, anti-trypsin, IgA |
| 14 | 1277.5 | 17.3 |    | Complex | $H_4N_3$    | Transferrin                      |
| 15 | 1277.5 | 20.1 |  | Complex | $H_4N_3$    | IgM, anti-trypsin, AGP           |

|    |        |      |                                                                                     |              |                                              |                    |
|----|--------|------|-------------------------------------------------------------------------------------|--------------|----------------------------------------------|--------------------|
| 16 | 1318.5 | 17.9 | 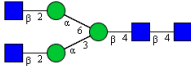   | Complex      | H <sub>3</sub> N <sub>4</sub>                | IgG, Transferrin   |
| 17 | 1318.5 | 15.4 |    | Complex      | H <sub>3</sub> N <sub>4</sub>                | IgA                |
| 18 | 1398.5 | 21.4 |    | High Mannose | H <sub>6</sub> N <sub>2</sub>                | alpha-2-macro, IgM |
| 19 | 1398.5 | 18.1 |    | High Mannose | H <sub>6</sub> N <sub>2</sub>                | IgM, IgA, AGP      |
| 20 | 1423.5 | 22.1 |  | Complex      | H <sub>4</sub> N <sub>3</sub> F <sub>1</sub> | IgG, alpha-2-macro |

|    |        |      |                                                                                     |         |             |                                          |
|----|--------|------|-------------------------------------------------------------------------------------|---------|-------------|------------------------------------------|
| 21 | 1423.5 | 19.1 | 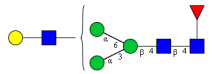   | Complex | $H_4N_3F_1$ | IgM                                      |
| 22 | 1423.5 | 15.6 |    | Complex | $H_4N_3F_1$ | IgA                                      |
| 23 | 1439.5 | 17.9 |    | Hybrid  | $H_5N_3$    | IgA, alpha-2-macro                       |
| 24 | 1439.5 | 18.3 |    | Hybrid  | $H_5N_3$    | IgM                                      |
| 25 | 1439.5 | 15.8 |  | Hybrid  | $H_5N_3$    | AGP, Transferrin, anti-trypsin, IgA, IgG |



|    |        |      |                                                                                     |         |             |                            |
|----|--------|------|-------------------------------------------------------------------------------------|---------|-------------|----------------------------|
| 26 | 1464.6 | 15.9 | 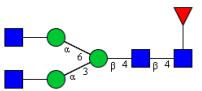   | Complex | $H_3N_4F_1$ | IgG                        |
| 27 | 1464.6 | 20.5 |    | Complex | $H_3N_4F_1$ | IgM, IgG, Transferrin, IgA |
| 28 | 1480.6 | 22.8 |    | Complex | $H_4N_4$    | anti-trypsin, AGP          |
| 29 | 1480.6 | 20.7 |    | Complex | $H_4N_4$    | AGP, Transferrin           |
| 30 | 1480.6 | 18.9 |  | Complex | $H_4N_4$    | IgG, IgM, AGP, Transferrin |

|    |        |      |  |              |                               |                                          |
|----|--------|------|--|--------------|-------------------------------|------------------------------------------|
| 31 | 1480.6 | 19.2 |  | Complex      | H <sub>4</sub> N <sub>4</sub> | IgA, IgG, Transferrin, AGP, anti-trypsin |
| 32 | 1521.6 | 14.4 |  | Complex      | H <sub>3</sub> N <sub>5</sub> | IgG, IgA                                 |
| 33 | 1560.6 | 19.2 |  | High Mannose | H <sub>7</sub> N <sub>2</sub> | IgM, alpha-2-macro                       |
| 34 | 1560.6 | 17.7 |  | High Mannose | H <sub>7</sub> N <sub>2</sub> | IgM, alpha-2-macro                       |
| 35 | 1560.6 | 18.3 |  | High Mannose | H <sub>7</sub> N <sub>2</sub> | IgM, IgA, AGP                            |

|    |        |      |  |         |             |                                               |
|----|--------|------|--|---------|-------------|-----------------------------------------------|
| 36 | 1568.6 | 25.8 |  | Complex | $H_4N_3S_1$ | anti-trypsin, Transferrin                     |
| 37 | 1568.6 | 23.7 |  | Complex | $H_4N_3S_1$ | anti-trypsin, IgA, Transferrin, alpha-2-macro |
| 38 | 1568.6 | 16.0 |  | Complex | $H_4N_3S_1$ | alpha-2-macro                                 |
| 39 | 1601.6 | 19.4 |  | Hybrid  | $H_6N_3$    | IgM, alpha-2-macro, IgA                       |
| 40 | 1601.6 | 13.5 |  | Hybrid  | $H_6N_3$    | alpha-2-macro                                 |

|    |        |      |                                                                                     |         |                                              |                                      |
|----|--------|------|-------------------------------------------------------------------------------------|---------|----------------------------------------------|--------------------------------------|
| 41 | 1601.6 | 18.3 | 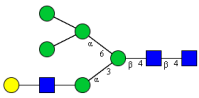   | Hybrid  | H <sub>6</sub> N <sub>3</sub>                | alpha-2-macro, IgM, IgA              |
| 42 | 1626.6 | 22.2 |    | Complex | H <sub>4</sub> N <sub>4</sub> F <sub>1</sub> | IgM, IgA, IgG                        |
| 43 | 1626.6 | 17.1 |    | Complex | H <sub>4</sub> N <sub>4</sub> F <sub>1</sub> | IgM, IgG                             |
| 44 | 1626.6 | 21.3 |    | Complex | H <sub>4</sub> N <sub>4</sub> F <sub>1</sub> | IgA, Transferrin, alpha-2-macro, IgG |
| 45 | 1626.6 | 14.6 |  | Complex | H <sub>4</sub> N <sub>4</sub> F <sub>1</sub> | IgG, IgM                             |

|    |        |      |                                                                                     |         |                               |                                                              |
|----|--------|------|-------------------------------------------------------------------------------------|---------|-------------------------------|--------------------------------------------------------------|
| 46 | 1642.6 | 17.2 | 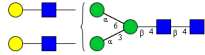   | Complex | H <sub>5</sub> N <sub>4</sub> | alpha-2-macro, AGP                                           |
| 47 | 1642.6 | 22.1 |    | Complex | H <sub>5</sub> N <sub>4</sub> | IgG, AGP, alpha-2-macro, Transferrin, IgM                    |
| 48 | 1642.6 | 20.0 |    | Complex | H <sub>5</sub> N <sub>4</sub> | IgG, anti-trypsin, AGP, alpha-2-macro, IgA, IgM, Transferrin |
| 49 | 1642.6 | 24.2 |    | Complex | H <sub>5</sub> N <sub>4</sub> | IgA, alpha-2-macro, Transferrin                              |
| 50 | 1642.6 | 13.9 |  | Complex | H <sub>5</sub> N <sub>4</sub> | IgM, IgG, Transferrin, alpha-2-macro, anti-trypsin, IgA, AGP |

|    |        |      |                                                                                     |         |                                              |                                           |
|----|--------|------|-------------------------------------------------------------------------------------|---------|----------------------------------------------|-------------------------------------------|
| 51 | 1642.6 | 16.4 | 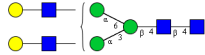   | Complex | H <sub>5</sub> N <sub>4</sub>                | IgM                                       |
| 52 | 1642.6 | 15.1 |    | Complex | H <sub>5</sub> N <sub>4</sub>                | IgA, IgM                                  |
| 53 | 1667.6 | 17.2 |    | Complex | H <sub>3</sub> N <sub>5</sub> F <sub>1</sub> | IgG, IgM, IgA                             |
| 54 | 1683.6 | 17.5 |    | Complex | H <sub>4</sub> N <sub>5</sub>                | IgA                                       |
| 55 | 1683.6 | 15.4 |  | Complex | H <sub>4</sub> N <sub>5</sub>                | IgM, IgG, IgA, alpha-2-macro, Transferrin |

|    |        |      |  |              |                                                             |                            |
|----|--------|------|--|--------------|-------------------------------------------------------------|----------------------------|
| 56 | 1683.6 | 20.5 |  | Complex      | H <sub>4</sub> N <sub>5</sub>                               | Transferrin                |
| 57 | 1714.6 | 28.2 |  | Complex      | H <sub>4</sub> N <sub>3</sub> F <sub>1</sub> S <sub>1</sub> | alpha-2-macro              |
| 58 | 1714.6 | 25.9 |  | Complex      | H <sub>4</sub> N <sub>3</sub> F <sub>1</sub> S <sub>1</sub> | IgM, IgA, IgA, Transferrin |
| 59 | 1722.6 | 19.5 |  | High Mannose | H <sub>8</sub> N <sub>2</sub>                               | IgM                        |
| 60 | 1722.6 | 18.4 |  | High Mannose | H <sub>8</sub> N <sub>2</sub>                               | IgM, alpha-2-macro, IgA    |

|    |        |      |                                                                                     |              |                                              |                                |
|----|--------|------|-------------------------------------------------------------------------------------|--------------|----------------------------------------------|--------------------------------|
| 61 | 1722.6 | 17.8 | 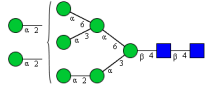   | High Mannose | H <sub>8</sub> N <sub>2</sub>                | IgM, IgA                       |
| 62 | 1729.6 | 22.9 |    | Hybrid       | H <sub>5</sub> N <sub>3</sub> S <sub>1</sub> | IgA, alpha-2-macro             |
| 63 | 1729.6 | 15.9 |    | Hybrid       | H <sub>5</sub> N <sub>3</sub> S <sub>1</sub> | alpha-2-macro, IgA             |
| 64 | 1729.6 | 20.8 |    | Hybrid       | H <sub>5</sub> N <sub>3</sub> S <sub>1</sub> | IgA, Transferrin, anti-trypsin |
| 65 | 1729.6 | 16.7 |  | Hybrid       | H <sub>5</sub> N <sub>3</sub> S <sub>1</sub> | anti-trypsin                   |



|    |        |      |                                                                                     |         |             |                                 |
|----|--------|------|-------------------------------------------------------------------------------------|---------|-------------|---------------------------------|
| 66 | 1747.6 | 14.6 | 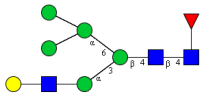   | Hybrid  | $H_6N_3F_1$ | IgM, alpha-2-macro              |
| 67 | 1747.6 | 15.2 |    | Hybrid  | $H_6N_3F_1$ | Transferrin, IgM                |
| 68 | 1771.6 | 23.9 |    | Complex | $H_4N_4S_1$ | alpha-2-macro, IgA, Transferrin |
| 69 | 1771.6 | 23.2 |    | Complex | $H_4N_4S_1$ | Transferrin, anti-trypsin       |
| 70 | 1771.6 | 22.7 |  | Complex | $H_4N_4S_1$ | Transferrin, IgM, anti-trypsin  |

|    |        |      |                                                                                     |         |                                              |                                                              |
|----|--------|------|-------------------------------------------------------------------------------------|---------|----------------------------------------------|--------------------------------------------------------------|
| 71 | 1771.7 | 16.3 | 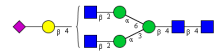   | Complex | H <sub>4</sub> N <sub>4</sub> S <sub>1</sub> | alpha-2-macro, anti-trypsin, IgA, Transferrin                |
| 72 | 1788.7 | 16.3 |    | Complex | H <sub>5</sub> N <sub>4</sub> F <sub>1</sub> | alpha-2-macro                                                |
| 73 | 1788.7 | 22.1 |    | Complex | H <sub>5</sub> N <sub>4</sub> F <sub>1</sub> | IgM, IgG, alpha-2-macro, IgA, Transferrin, anti-trypsin, AGP |
| 74 | 1788.7 | 18.0 |    | Complex | H <sub>5</sub> N <sub>4</sub> F <sub>1</sub> | IgA, IgM, alpha-2-macro                                      |
| 75 | 1788.7 | 15.5 |  | Complex | H <sub>5</sub> N <sub>4</sub> F <sub>1</sub> | alpha-2-macro, IgA, IgG, Transferrin, IgM                    |

|    |        |      |  |         |                                              |                                                         |
|----|--------|------|--|---------|----------------------------------------------|---------------------------------------------------------|
| 76 | 1788.7 | 19.9 |  | Complex | H <sub>5</sub> N <sub>4</sub> F <sub>1</sub> | IgA, alpha-2-macro, Transferrin, anti-trypsin, IgM, AGP |
| 77 | 1804.7 | 21.1 |  | Hybrid  | H <sub>6</sub> N <sub>4</sub>                | Transferrin                                             |
| 78 | 1829.7 | 18.0 |  | Complex | H <sub>4</sub> N <sub>5</sub>                | IgA, IgM, alpha-2-macro                                 |
| 79 | 1829.7 | 14.3 |  | Complex | H <sub>4</sub> N <sub>5</sub>                | IgM, IgA                                                |
| 80 | 1845.7 | 20.7 |  | Complex | H <sub>5</sub> N <sub>5</sub>                | IgA, Transferrin, AGP                                   |

|    |        |      |                                                                                     |         |                                                             |                                           |
|----|--------|------|-------------------------------------------------------------------------------------|---------|-------------------------------------------------------------|-------------------------------------------|
| 81 | 1845.7 | 18.5 | 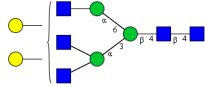   | Complex | H <sub>5</sub> N <sub>5</sub>                               | IgA, IgM                                  |
| 82 | 1845.7 | 16.5 |    | Complex | H <sub>5</sub> N <sub>5</sub>                               | IgA, IgG, Transferrin, IgM, alpha-2-macro |
| 83 | 1845.7 | 22.0 |    | Complex | H <sub>5</sub> N <sub>5</sub>                               | Transferrin, AGP                          |
| 84 | 1845.7 | 13.0 |    | Complex | H <sub>5</sub> N <sub>5</sub>                               | alpha-2-macro, IgM                        |
| 85 | 1876.7 | 17.5 |  | Hybrid  | H <sub>5</sub> N <sub>3</sub> F <sub>1</sub> S <sub>1</sub> | alpha-2-macro                             |

|    |        |      |                                                                                     |                 |                |                         |
|----|--------|------|-------------------------------------------------------------------------------------|-----------------|----------------|-------------------------|
| 86 | 1876.7 | 27.9 | 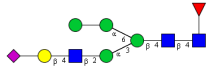   | Hybrid          | $H_5N_3F_1S_1$ | alpha-2-macro           |
| 87 | 1876.7 | 24.9 |    | Hybrid          | $H_5N_3F_1S_1$ | IgM, alpha-2-macro      |
| 88 | 1884.7 | 17.9 |    | High<br>Mannose | $H_9N_2$       | IgM, AGP, alpha-2-macro |
| 89 | 1892.7 | 27.2 |    | Hybrid          | $H_6N_3S_1$    | alpha-2-macro           |
| 90 | 1892.7 | 24.0 |  | Hybrid          | $H_6N_3S_1$    | alpha-2-macro           |

|    |        |      |                                                                                     |         |                |                   |
|----|--------|------|-------------------------------------------------------------------------------------|---------|----------------|-------------------|
| 91 | 1892.7 | 23.1 | 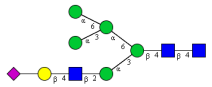   | Hybrid  | $H_6N_3S_1$    | alpha-2-macro     |
| 92 | 1892.7 | 17.1 |    | Hybrid  | $H_6N_3S_1$    | alpha-2-macro     |
| 93 | 1917.7 | 25.7 |    | Hybrid  | $H_4N_4F_1S_1$ | IgA, IgM, IgG     |
| 94 | 1917.7 | 28.3 |    | Hybrid  | $H_4N_4F_1S_1$ | alpha-2-macro     |
| 95 | 1918.7 | 16.9 |  | Complex | $H_4N_4F_3$    | AGP, anti-trypsin |

|    |        |      |                                                                                     |         |                                              |                                 |
|----|--------|------|-------------------------------------------------------------------------------------|---------|----------------------------------------------|---------------------------------|
| 96 | 1933.7 | 24.7 | 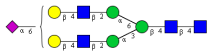   | Complex | H <sub>5</sub> H <sub>4</sub> S <sub>1</sub> | alpha-2-macro, Transferrin, IgG |
| 97 | 1933.7 | 23.6 |    | Complex | H <sub>5</sub> H <sub>4</sub> S <sub>1</sub> | anti-trypsin, AGP               |
| 98 | 1933.7 | 27.4 |    | Complex | H <sub>5</sub> H <sub>4</sub> S <sub>1</sub> | Transferrin, anti-trypsin       |
| 99 | 1933.7 | 26.5 |    | Complex | H <sub>5</sub> H <sub>4</sub> S <sub>1</sub> | IgM                             |
| 10 | 1933.7 | 17.2 |  | Complex | H <sub>5</sub> H <sub>4</sub> S <sub>1</sub> | alpha-2-macro, IgA              |

|     |        |      |                                                                                     |         |                                              |                                  |
|-----|--------|------|-------------------------------------------------------------------------------------|---------|----------------------------------------------|----------------------------------|
| 101 | 1933.7 | 24.1 | 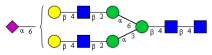   | Complex | H <sub>5</sub> H <sub>4</sub> S <sub>1</sub> | Transferrin                      |
| 102 | 1933.7 | 19.9 |    | Complex | H <sub>5</sub> H <sub>4</sub> S <sub>1</sub> | alpha-2-macro, anti-trypsin, IgA |
| 103 | 1933.7 | 20.7 |    | Complex | H <sub>5</sub> H <sub>4</sub> S <sub>1</sub> | anti-trypsin, alpha-2-macro      |
| 104 | 1933.7 | 18.6 |    | Complex | H <sub>5</sub> H <sub>4</sub> S <sub>1</sub> | anti-trypsin                     |
| 105 | 1934.7 | 21.7 |  | Complex | H <sub>5</sub> N <sub>4</sub> F <sub>2</sub> | IgA                              |



|     |        |      |                                                                                     |         |                                              |          |
|-----|--------|------|-------------------------------------------------------------------------------------|---------|----------------------------------------------|----------|
| 106 | 1974.7 | 19.8 | 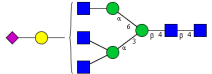   | Complex | H <sub>4</sub> N <sub>5</sub> S <sub>1</sub> | IgA, IgM |
| 107 | 1974.7 | 14.6 |    | Complex | H <sub>4</sub> N <sub>5</sub> S <sub>1</sub> | IgA      |
| 108 | 1974.7 | 15.4 |    | Complex | H <sub>4</sub> N <sub>5</sub> S <sub>1</sub> | IgA      |
| 109 | 1975.8 | 17.4 |    | Complex | H <sub>4</sub> N <sub>F</sub> 2              | IgG      |
| 110 | 1991.7 | 22.4 |  | Complex | H <sub>5</sub> N <sub>5</sub> F <sub>1</sub> | IgA, IgM |

|     |        |      |                                                                                     |         |                                              |                                                |
|-----|--------|------|-------------------------------------------------------------------------------------|---------|----------------------------------------------|------------------------------------------------|
| 111 | 1991.7 | 18.6 | 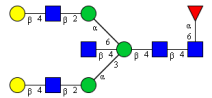   | Complex | H <sub>5</sub> N <sub>5</sub> F <sub>1</sub> | IgM, alpha-2-macro, IgA, IgG, AGP, Transferrin |
| 112 | 1991.7 | 19.7 |    | Complex | H <sub>5</sub> N <sub>5</sub> F <sub>1</sub> | alpha-2-macro                                  |
| 113 | 1991.7 | 19.0 |    | Complex | H <sub>5</sub> N <sub>5</sub> F <sub>1</sub> | alpha-2-macro                                  |
| 114 | 1991.7 | 14.6 |    | Complex | H <sub>5</sub> N <sub>5</sub> F <sub>1</sub> | IgM, alpha-2-macro, IgA                        |
| 115 | 1991.7 | 15.9 |  | Complex | H <sub>5</sub> N <sub>5</sub> F <sub>1</sub> | IgA, IgM                                       |

|     |        |      |                                                                                     |         |                               |                                          |
|-----|--------|------|-------------------------------------------------------------------------------------|---------|-------------------------------|------------------------------------------|
| 116 | 2007.7 | 16.3 | 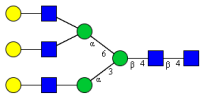   | Complex | H <sub>6</sub> N <sub>5</sub> | alpha-2-macro, Transferrin               |
| 117 | 2007.7 | 21.1 |    | Complex | H <sub>6</sub> N <sub>5</sub> | alpha-2-macro, IgA                       |
| 118 | 2007.7 | 19.4 |    | Complex | H <sub>6</sub> N <sub>5</sub> | IgM, IgG, IgA                            |
| 119 | 2007.7 | 22.6 |    | Complex | H <sub>6</sub> N <sub>5</sub> | anti-trypsin, IgA, IgM, AGP, Transferrin |
| 120 | 2007.7 | 23.5 |  | Complex | H <sub>6</sub> N <sub>5</sub> | AGP                                      |

|     |        |      |  |              |                                                             |                                |
|-----|--------|------|--|--------------|-------------------------------------------------------------|--------------------------------|
| 121 | 2007.7 | 21.3 |  | Complex      | H <sub>6</sub> N <sub>5</sub>                               | AGP, anti-trypsin, Transferrin |
| 122 | 2046.7 | 18.7 |  | High Mannose | H <sub>10</sub> N <sub>2</sub>                              | IgM                            |
| 123 | 2079.8 | 28.2 |  | Complex      | H <sub>5</sub> N <sub>4</sub> F <sub>1</sub> S <sub>1</sub> | IgA, Transferrin               |
| 124 | 2079.8 | 24.1 |  | Complex      | H <sub>5</sub> N <sub>4</sub> F <sub>1</sub> S <sub>1</sub> | alpha-2-macro, IgA             |
| 125 | 2079.8 | 25.7 |  | Complex      | H <sub>5</sub> N <sub>4</sub> F <sub>1</sub> S <sub>1</sub> | IgA, anti-trypsin              |

|     |        |      |  |         |                                                             |                                            |
|-----|--------|------|--|---------|-------------------------------------------------------------|--------------------------------------------|
| 126 | 2079.8 | 26.2 |  | Complex | H <sub>5</sub> N <sub>4</sub> F <sub>1</sub> S <sub>1</sub> | IgA, alpha-2-macro, anti-trypsin, IgM, IgG |
| 127 | 2079.8 | 28.5 |  | Complex | H <sub>5</sub> N <sub>4</sub> F <sub>1</sub> S <sub>1</sub> | alpha-2-macro, IgM                         |
| 128 | 2079.8 | 16.6 |  | Complex | H <sub>5</sub> N <sub>4</sub> F <sub>1</sub> S <sub>1</sub> | alpha-2-macro                              |
| 129 | 2079.8 | 21.0 |  | Complex | H <sub>5</sub> N <sub>4</sub> F <sub>1</sub> S <sub>1</sub> | alpha-2-macro, anti-trypsin                |
| 130 | 2079.8 | 26.6 |  | Complex | H <sub>5</sub> N <sub>4</sub> F <sub>1</sub> S <sub>1</sub> | Transferrin, IgG                           |

|     |        |      |                                                                                     |         |                                                             |                             |
|-----|--------|------|-------------------------------------------------------------------------------------|---------|-------------------------------------------------------------|-----------------------------|
| 131 | 2079.8 | 21.5 | 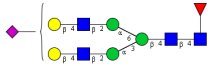   | Complex | H <sub>5</sub> N <sub>4</sub> F <sub>1</sub> S <sub>1</sub> | alpha-2-macro               |
| 132 | 2079.8 | 23.3 |    | Complex | H <sub>5</sub> N <sub>4</sub> F <sub>1</sub> S <sub>1</sub> | alpha-2-macro, anti-trypsin |
| 133 | 2079.8 | 18.8 |    | Complex | H <sub>5</sub> N <sub>4</sub> F <sub>1</sub> S <sub>1</sub> | IgA                         |
| 134 | 2079.8 | 18.6 |    | Complex | H <sub>5</sub> N <sub>4</sub> F <sub>1</sub> S <sub>1</sub> | alpha-2-macro, IgA          |
| 135 | 2079.8 | 26.2 |  | Complex | H <sub>5</sub> N <sub>4</sub> F <sub>1</sub> S <sub>1</sub> | Transferrin                 |

|     |        |      |                                                                                     |         |                                                             |          |
|-----|--------|------|-------------------------------------------------------------------------------------|---------|-------------------------------------------------------------|----------|
| 136 | 2079.8 | 18.6 | 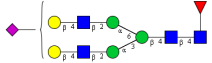   | Complex | H <sub>5</sub> N <sub>4</sub> F <sub>1</sub> S <sub>1</sub> | IgM      |
| 137 | 2079.8 | 21.0 |    | Complex | H <sub>5</sub> N <sub>4</sub> F <sub>1</sub> S <sub>1</sub> | IgA, AGP |
| 138 | 2080.8 | 20.8 |    | Complex | H <sub>5</sub> N <sub>4</sub> F <sub>3</sub>                | AGP      |
| 139 | 2120.8 | 22.6 |    | Complex | H <sub>4</sub> N <sub>5</sub> F <sub>1</sub> S <sub>1</sub> | IgM, IgA |
| 140 | 2120.8 | 21.8 |  | Complex | H <sub>4</sub> N <sub>5</sub> F <sub>1</sub> S <sub>1</sub> | IgA, IgM |

|     |        |      |                                                                                     |         |                                                             |                                   |
|-----|--------|------|-------------------------------------------------------------------------------------|---------|-------------------------------------------------------------|-----------------------------------|
| 141 | 2120.8 | 16.9 | 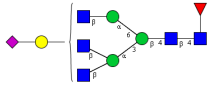   | Complex | H <sub>4</sub> N <sub>5</sub> F <sub>1</sub> S <sub>1</sub> | IgA                               |
| 142 | 2136.8 | 22.4 |    | Complex | H <sub>5</sub> N <sub>5</sub> S <sub>1</sub>                | IgA, IgG, IgM                     |
| 143 | 2136.8 | 25.6 |    | Complex | H <sub>5</sub> N <sub>5</sub> S <sub>1</sub>                | AGP                               |
| 144 | 2136.8 | 20.7 |    | Complex | H <sub>5</sub> N <sub>5</sub> S <sub>1</sub>                | IgM, alpha-2-macro, AGP, IgG, IgA |
| 145 | 2136.8 | 15.5 |  | Complex | H <sub>5</sub> N <sub>5</sub> S <sub>1</sub>                | IgA                               |



|     |        |      |                                                                                     |         |                                              |                                |
|-----|--------|------|-------------------------------------------------------------------------------------|---------|----------------------------------------------|--------------------------------|
| 146 | 2137.8 | 21.8 | 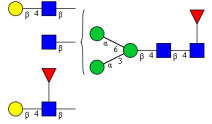   | Complex | H <sub>5</sub> N <sub>5</sub> F <sub>2</sub> | alpha-2-macro                  |
| 147 | 2137.8 | 20.4 |    | Complex | H <sub>5</sub> N <sub>5</sub> F <sub>2</sub> | alpha-2-macro                  |
| 148 | 2137.8 | 18.1 |    | Complex | H <sub>5</sub> N <sub>5</sub> F <sub>2</sub> | IgA                            |
| 149 | 2153.7 | 16.0 |   | Complex | H <sub>6</sub> N <sub>5</sub> F <sub>1</sub> | alpha-2-macro, Tranferrin, IgA |
| 150 | 2153.8 | 23.7 |  | Complex | H <sub>6</sub> H <sub>5</sub> F <sub>1</sub> | AGP                            |

|     |        |      |                                                                                     |         |                                              |                         |
|-----|--------|------|-------------------------------------------------------------------------------------|---------|----------------------------------------------|-------------------------|
| 151 | 2153.8 | 20.1 | 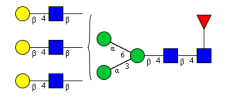   | Complex | H <sub>6</sub> H <sub>5</sub> F <sub>1</sub> | IgM, IgA                |
| 152 | 2153.8 | 17.0 |    | Complex | H <sub>6</sub> H <sub>5</sub> F <sub>1</sub> | alpha-2-macro           |
| 153 | 2153.8 | 22.9 |    | Complex | H <sub>6</sub> H <sub>5</sub> F <sub>1</sub> | alpha-2-macro, IgM, IgA |
| 154 | 2153.8 | 21.1 |    | Complex | H <sub>6</sub> H <sub>5</sub> F <sub>1</sub> | IgA, anti-trypsin, IgM  |
| 155 | 2153.8 | 24.5 |  | Complex | H <sub>6</sub> H <sub>5</sub> F <sub>1</sub> | AGP, IgA, alpha-2-macro |

|     |        |      |                                                                                     |         |             |              |
|-----|--------|------|-------------------------------------------------------------------------------------|---------|-------------|--------------|
| 156 | 2153.8 | 21.6 | 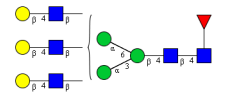   | Complex | $H_6H_5F_1$ | AGP          |
| 157 | 2210.8 | 24.8 |    | Complex | $H_6N_6$    | anti-trypsin |
| 158 | 2210.8 | 26.9 |    | Complex | $H_6N_6$    | anti-trypsin |
| 159 | 2210.8 | 23.0 |    | Complex | $H_6N_6$    | AGP          |
| 160 | 2210.8 | 22.2 |  | Complex | $H_6N_6$    | AGP          |

|     |        |      |                                                                                     |         |                                              |                                                    |
|-----|--------|------|-------------------------------------------------------------------------------------|---------|----------------------------------------------|----------------------------------------------------|
| 161 | 2210.8 | 28.8 | 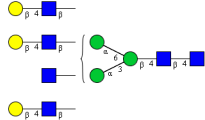   | Complex | H <sub>6</sub> N <sub>6</sub>                | anti-trypsin, alpha-2-macro                        |
| 162 | 2224.8 | 25.5 |    | Complex | H <sub>5</sub> N <sub>4</sub> S <sub>2</sub> | alpha-2-macro, Transferrin, anti-trypsin           |
| 163 | 2224.8 | 33.6 |    | Complex | H <sub>5</sub> N <sub>4</sub> S <sub>2</sub> | alpha-2-macro                                      |
| 164 | 2224.8 | 31.1 |    | Complex | H <sub>5</sub> N <sub>4</sub> S <sub>2</sub> | anti-trypsin                                       |
| 165 | 2224.8 | 29.2 |  | Complex | H <sub>5</sub> N <sub>4</sub> S <sub>2</sub> | alpha-2-macro, IgA, anti-trypsin, IgM, Transferrin |

|     |        |      |                                                                                     |         |                                                             |                                          |
|-----|--------|------|-------------------------------------------------------------------------------------|---------|-------------------------------------------------------------|------------------------------------------|
| 166 | 2224.8 | 27.3 | 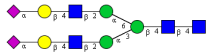   | Complex | H <sub>5</sub> N <sub>4</sub> S <sub>2</sub>                | anti-trypsin, Transferrin                |
| 167 | 2224.8 | 22.9 |    | Complex | H <sub>5</sub> N <sub>4</sub> S <sub>2</sub>                | anti-trypsin, alpha-2-macro, Transferrin |
| 168 | 2224.8 | 20.7 |    | Complex | H <sub>5</sub> N <sub>4</sub> S <sub>2</sub>                | anti-trypsin, alpha-2-macro              |
| 169 | 2225.8 | 27.5 |    | Complex | H <sub>5</sub> N <sub>4</sub> F <sub>2</sub> S <sub>1</sub> | alpha-2-macro                            |
| 170 | 2225.8 | 26.1 |  | Complex | H <sub>5</sub> N <sub>4</sub> F <sub>2</sub> S <sub>1</sub> | IgM                                      |

|     |        |      |                                                                                     |         |                                                             |                         |
|-----|--------|------|-------------------------------------------------------------------------------------|---------|-------------------------------------------------------------|-------------------------|
| 171 | 2282.8 | 25.4 | 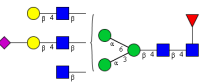   | Complex | H <sub>5</sub> N <sub>5</sub> F <sub>1</sub> S <sub>1</sub> | alpha-2-macro           |
| 172 | 2282.8 | 23.0 |    | Complex | H <sub>5</sub> N <sub>5</sub> F <sub>1</sub> S <sub>1</sub> | alpha-2-macro           |
| 173 | 2282.8 | 22.4 |    | Complex | H <sub>5</sub> N <sub>5</sub> F <sub>1</sub> S <sub>1</sub> | IgM, IgG, IgA           |
| 174 | 2282.8 | 17.5 |    | Complex | H <sub>5</sub> N <sub>5</sub> F <sub>1</sub> S <sub>1</sub> | IgA, IgM, alpha-2-macro |
| 175 | 2283.8 | 18.5 |  | Complex | H <sub>5</sub> N <sub>5</sub> F <sub>3</sub>                | IgA, IgG                |

|     |        |      |                                                                                     |         |                                              |                            |
|-----|--------|------|-------------------------------------------------------------------------------------|---------|----------------------------------------------|----------------------------|
| 176 | 2283.9 | 20.0 | 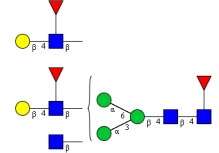   | Complex | H <sub>5</sub> N <sub>5</sub> F <sub>3</sub> | AGP                        |
| 177 | 2298.8 | 29.3 |    | Complex | H <sub>6</sub> N <sub>5</sub> S <sub>1</sub> | anti-trypsin               |
| 178 | 2298.8 | 27.5 |    | Complex | H <sub>6</sub> N <sub>5</sub> S <sub>1</sub> | AGP, anti-trypsin          |
| 179 | 2298.8 | 26.1 |   | Complex | H <sub>6</sub> N <sub>5</sub> S <sub>1</sub> | IgA, IgM                   |
| 180 | 2298.8 | 25.1 |  | Complex | H <sub>6</sub> N <sub>5</sub> S <sub>1</sub> | Transferrin, alpha-2-macro |

|     |        |      |                                                                                     |         |                                              |                                 |
|-----|--------|------|-------------------------------------------------------------------------------------|---------|----------------------------------------------|---------------------------------|
| 181 | 2298.8 | 26.0 | 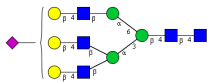   | Complex | H <sub>6</sub> N <sub>5</sub> S <sub>1</sub> | anti-trypsin, AGP               |
| 182 | 2298.8 | 26.5 |    | Complex | H <sub>6</sub> N <sub>5</sub> S <sub>1</sub> | alpha-2-macro, Transferrin, AGP |
| 183 | 2298.8 | 19.9 |    | Complex | H <sub>6</sub> N <sub>5</sub> S <sub>1</sub> | anti-trypsin, alpha-2-macro     |
| 184 | 2299.8 | 19.0 |    | Complex | H <sub>6</sub> N <sub>5</sub> F <sub>2</sub> | alpha-2-macro                   |
| 185 | 2299.9 | 22.4 |  | Complex | H <sub>6</sub> N <sub>5</sub> F <sub>2</sub> | IgA, IgM                        |



|     |        |      |                                                                                     |         |                                                             |                                     |
|-----|--------|------|-------------------------------------------------------------------------------------|---------|-------------------------------------------------------------|-------------------------------------|
| 186 | 2356.9 | 29.2 | 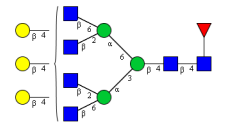   | Complex | H <sub>6</sub> N <sub>6</sub> F <sub>1</sub>                | alpha-2-macro                       |
| 187 | 2356.9 | 20.2 |    | Complex | H <sub>6</sub> N <sub>6</sub> F <sub>1</sub>                | IgA, alpha-2-macro                  |
| 188 | 2370.8 | 32.4 |    | Complex | H <sub>5</sub> N <sub>4</sub> F <sub>1</sub> S <sub>2</sub> | anti-trypsin, alpha-2-macro         |
| 189 | 2370.8 | 35.4 |    | Complex | H <sub>5</sub> N <sub>4</sub> F <sub>1</sub> S <sub>2</sub> | anti-trypsin                        |
| 190 | 2370.9 | 30.9 |  | Complex | H <sub>5</sub> N <sub>4</sub> F <sub>1</sub> S <sub>2</sub> | IgM, Transferrin, IgA, anti-trypsin |

|     |        |      |                                                                                     |         |                                                             |                         |
|-----|--------|------|-------------------------------------------------------------------------------------|---------|-------------------------------------------------------------|-------------------------|
| 191 | 2370.9 | 22.2 | 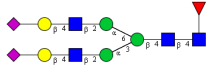   | Complex | H <sub>5</sub> N <sub>4</sub> F <sub>1</sub> S <sub>2</sub> | anti-trypsin, IgA       |
| 192 | 2372.9 | 31.4 |    | Complex | H <sub>7</sub> N <sub>6</sub>                               | alpha-2-macro           |
| 193 | 2372.9 | 23.3 |    | Complex | H <sub>7</sub> N <sub>6</sub>                               | AGP, IgA, alpha-2-macro |
| 194 | 2372.9 | 25.3 |    | Complex | H <sub>7</sub> N <sub>6</sub>                               | AGP                     |
| 195 | 2372.9 | 19.9 |  | Complex | H <sub>7</sub> N <sub>6</sub>                               | AGP                     |

|     |        |      |                                                                                     |         |                                                             |                                       |
|-----|--------|------|-------------------------------------------------------------------------------------|---------|-------------------------------------------------------------|---------------------------------------|
| 196 | 2425.8 | 26.6 | 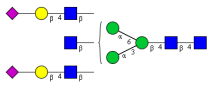   | Complex | H <sub>5</sub> N <sub>5</sub> S <sub>2</sub>                | IgA                                   |
| 197 | 2444.9 | 27.4 |    | Complex | H <sub>6</sub> N <sub>5</sub> F <sub>1</sub> S <sub>1</sub> | AGP, anti-trypsin, alpha-2-macro, IgA |
| 198 | 2444.9 | 25.2 |    | Complex | H <sub>6</sub> N <sub>5</sub> F <sub>1</sub> S <sub>1</sub> | IgA                                   |
| 199 | 2444.9 | 28.2 |    | Complex | H <sub>6</sub> N <sub>5</sub> F <sub>1</sub> S <sub>1</sub> | alpha-2-macro                         |
| 200 | 2444.9 | 26.6 |  | Complex | H <sub>6</sub> N <sub>5</sub> F <sub>1</sub> S <sub>1</sub> | alpha-2-macro, IgA                    |

|     |        |      |                                                                                     |         |                |               |
|-----|--------|------|-------------------------------------------------------------------------------------|---------|----------------|---------------|
| 201 | 2444.9 | 27.7 | 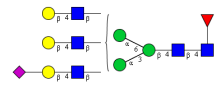   | Complex | $H_6N_5F_1S_1$ | alpha-2-macro |
| 202 | 2518.9 | 24.9 |    | Complex | $H_7N_6F_1$    | AGP           |
| 203 | 2559.9 | 17.4 |    | Complex | $H_6N_7F_1$    | IgA           |
| 204 | 2571.9 | 22.1 |    | Complex | $H_5N_5F_1S_2$ | anti-trypsin  |
| 205 | 2571.9 | 29.9 |  | Complex | $H_5N_5F_1S_2$ | anti-trypsin  |

|     |        |      |                                                                                     |         |                                                             |                    |
|-----|--------|------|-------------------------------------------------------------------------------------|---------|-------------------------------------------------------------|--------------------|
| 206 | 2573.9 | 27.9 | 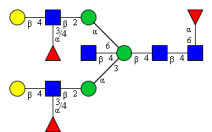   | Complex | H <sub>5</sub> N <sub>5</sub> F <sub>1</sub> S <sub>2</sub> | IgA, anti-trypsin  |
| 207 | 2573.9 | 29.0 |    | Complex | H <sub>5</sub> N <sub>5</sub> F <sub>1</sub> S <sub>2</sub> | IgM, alpha-2-macro |
| 208 | 2575.9 | 22.1 |    | Complex | H <sub>7</sub> N <sub>7</sub>                               | anti-trypsin       |
| 209 | 2575.9 | 26.7 |   | Complex | H <sub>7</sub> N <sub>7</sub>                               | AGP                |
| 210 | 2589.9 | 30.2 |  | Complex | H <sub>6</sub> N <sub>5</sub> S <sub>2</sub>                | anti-trypsin, IgM  |

|     |        |      |                                                                                     |         |                                                             |                                          |
|-----|--------|------|-------------------------------------------------------------------------------------|---------|-------------------------------------------------------------|------------------------------------------|
| 211 | 2589.9 | 29.3 | 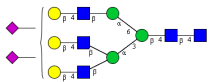   | Complex | H <sub>6</sub> N <sub>5</sub> S <sub>2</sub>                | anti-trypsin                             |
| 212 | 2589.9 | 30.9 |    | Complex | H <sub>6</sub> N <sub>5</sub> S <sub>2</sub>                | alpha-2-macro, anti-trypsin, Transferrin |
| 213 | 2648.0 | 23.6 |    | Complex | H <sub>6</sub> N <sub>6</sub> F <sub>1</sub> S <sub>1</sub> | IgA                                      |
| 214 | 2664.0 | 26.3 |    | Complex | H <sub>7</sub> N <sub>6</sub> S <sub>1</sub>                | AGP, anti-trypsin                        |
| 215 | 2664.0 | 27.4 |  | Complex | H <sub>7</sub> N <sub>6</sub> S <sub>1</sub>                | AGP                                      |

|     |        |      |                                                                                     |         |                                                             |                   |
|-----|--------|------|-------------------------------------------------------------------------------------|---------|-------------------------------------------------------------|-------------------|
| 216 | 2736.0 | 23.4 | 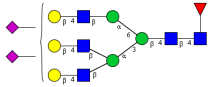   | Complex | H <sub>6</sub> N <sub>5</sub> F <sub>1</sub> S <sub>1</sub> | anti-trypsin      |
| 217 | 2736.0 | 30.6 |    | Complex | H <sub>6</sub> N <sub>5</sub> F <sub>1</sub> S <sub>1</sub> | anti-trypsin      |
| 218 | 2736.0 | 29.0 |    | Complex | H <sub>6</sub> N <sub>5</sub> F <sub>1</sub> S <sub>1</sub> | anti-trypsin, IgA |
| 219 | 2881.0 | 49.5 |    | Complex | H <sub>6</sub> N <sub>5</sub> S <sub>3</sub>                | IgM               |
| 220 | 2881.0 | 51.9 |  | Complex | H <sub>6</sub> N <sub>5</sub> S <sub>3</sub>                | IgM, IgG          |

|     |        |      |                                                                                   |         |                                              |          |
|-----|--------|------|-----------------------------------------------------------------------------------|---------|----------------------------------------------|----------|
| 221 | 2881.0 | 52.7 | 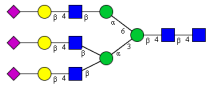 | Complex | H <sub>6</sub> N <sub>5</sub> S <sub>3</sub> | IgG      |
| 222 | 2881.0 | 53.2 |  | Complex | H <sub>6</sub> N <sub>5</sub> S <sub>3</sub> | IgG, IgA |
